# Supplementary material for: Negative effects of agricultural open-channel irrigation system on vertebrate populations in central Mexico
Source: PeerJ. 2024 Jul 26;12:e17818. doi: 10.7717/peerj.17818 (PMC11285387; doi:10.7717/peerj.17818)
Supplement: Supplemental Information 1 [file peerj-12-17818-s001.xlsx]

## Sheet: Samplings
DATE	SPECIES	NUMBER OF DEAD INDIVIDUALS	NUMBER OF ALIVE INDIVIDUALS	TOTAL OF INDIVIDUALS RECORDED	Number of participants
June 15 2014	Thamnophis sp.	0	2	2	5
	Crotalus triseriatus	8	1	9
	Sceloporus sp.	0	1	1
	Barisia imbricata	0	1	1
June 22 2014	Crotalus triseriatus	7	3	10	5
	Thamnophis sp.	2	4	6
	Barisia imbricata	0	1	1
	Sceloporus sp.	0	4	4
	Thamnophis sp.	1	2	3
October 10 2014	Crotalus triseriatus	2	1	3	5
	Barisia imbricata	0	1	1
	Sceloporus sp.	0	2	2
	Thamnophis sp.	1	1	2
	Thamnophis sp.	0	1	1
November 11 2014	Crotalus triseriatus	0	3	3	4
	Sceloporus sp.	0	5	5
	Thamnophis sp.	0	1	1
	Thamnophis sp.	0	2	2
December 12 2014	Crotalus triseriatus	0	2	2	5
	Thamnophis sp.	0	1	1
	Thamnophis sp.	1	0	1
January 1 2015	Crotalus triseriatus	0	1	1	4
	Ambystoma granulosum	1	0	1
February 9 2015	Sceloporus sp.	0	1	1	5
September 7 2015	Barisia imbricata	7	1	8	5
	Crotalus triseriatus	9	0	9
	Thamnophis sp.	1	0	1
	Thamnophis sp.	1	0	1
	Thamnophis sp.	1	0	1
October 5 2015	Sceloporus sp.	0	1	1	4
	Sceloporus sp.	0	2	2
	Thamnophis sp.	0	3	3
	Barisia imbricata	6	1	7
November 16 2015	Thamnophis sp.	0	2	2	4
	Sceloporus sp.	0	1	1
	Sceloporus sp.	0	5	5
	Barisia imbricata	4	2	6
	Thamnophis sp.	1	2	3
	Microtus mexicanus	18	0	18
January 10 2016	Microtus mexicanus	10	0	10	5
	Barisia imbricata	1	0	1
	Thamnophis sp.	2	0	2
February 20 2016	Thamnophis sp.	0	1	1	5
	Thamnophis sp.	1	0	1
	Microtus mexicanus	1	0	1
	Thamnophis sp.	1	0	1
	Microtus mexicanus	1	0	1
	Cryptotis parva	1	0	1
August 30 2016	Crotalus triseriatus	5	3	8	5
	Barisia imbricata	1	0	1
	Microtus mexicanus	7	0	7
	Sceloporus sp.	0	10	10
	Thamnophis sp.	0	2	2
	Thamnophis sp.	0	1	1
	Thamnophis sp.	1	0	1
	Dryophytes eximius	0	1	1
October 4 2016	Thamnophis sp.	2	0	2	5
	Microtus mexicanus	11	0	11
	Dryophytes eximius	0	2	2
	Annas sp.	2	0	2
	Barisia imbricata	1	2	3
	Neotoma mexicana	1	0	1
November 8 2016	Thamnophis sp.	4	0	4	5
	Microtus mexicanus	13	0	13
	Cryptotis parva	2	0	2
	Crotalus triseriatus	0	3	3
	Ambystoma granulosum	0	2	2
		139	88	227

## Sheet: Records-transect-structure-seas
							MORTALITY OF VERTEBRATES IN THE IRRIGATION CHANNEL STRUCTURES									Records in each floodgate
Species	Number_ dead individuals	Number_alive individuals					Channel		Floodgate		Outside_Channel				Species	1	2	3	4	5	6	7	8	9	10	11	12	13	14	total
Dryophytes eximius	0	3					Number_alive individuals	Number_ dead individuals	Number_alive individuals	Number_ dead individuals	Number_alive individuals	Number_ dead individuals	TOTAL		Microtus mexicanus	0	0	2	1	1	1	9	1	2	4	2	0	1	0	24
Scelophorus sp.	0	32				Dryophytes eximius	0	0	3	0	0	0	3		Neotoma mexicana	0	0	0	0	0	0	0	0	1	0	0	0	0	0	1
Cryptotis parva	3	0				Sceloporus sp.	32	0	0	0	0	0	32		Tamnophis spp.	0	0	0	2	0	0	1	0	2	0	0	0	0	1	6
Ambystoma granulosum	1	2				Cryptotis parva	0	0	0	3	0	0	3		Cryptotis parva	0	0	0	0	0	0	0	0	1	0	0	0	0	2	3
Annas diazi	2	0				Ambystoma granulosum	0	1	2	0	0	0	3		Ambystoma granulosum	0	0	0	2	0	0	0	0	0	0	0	0	0	0	2
Crotalus triseriatus	31	17				Annas diazi	0	0	1	0	0	1	2		Barisia imbricata	0	0	0	0	0	0	0	0	0	1	0	0	0	0	1
Tamnophis spp.	20	25				Crotalus triseriatus	0	31	0	0	17	0	48			0	0	2	5	1	1	10	1	6	5	2	0	1	3	37
Barisia imbricata	20	9				Tamnophis spp.	4	5	14	15	7	0	45		Depth(cm)	167	69	67	200	94	87	110	167	132	89	133	155	135	135
Microtus mexicanus	61	0				Barisia imbricata	5	18	0	2	4	0	29		Dimensions	107x105	70x99	105x71	103x103	91x90	89x89	92x90	111x107	105x105	90x91	108x110	108x110	107x112	107x100
Neotoma mexicana	1	0				Microtus mexicanus	0	2	0	59	0	0	61		Channel width major base (cm)	77					49				37		34
TOTAL	139	88				Neotoma mexicana	0	0	0	1	0	0	1		Channel width minor base (cm)	42					26				37		34
							41	57	20	80	28	1	227		Channel high (cm)	51					41				40		40
Mammals	65	0													Channel high (above the ground)	50	120	116	117	17	0	34	30	13	28	25	18	0	0
Reptiles	43	83
Amphibians	1	5
Birds	2	0
								RECORDS PER TRANSECT
							Transect Number
							1	2	3	4
						Dryophytes eximius	0	0	3	0
	MORTALITY OF VERTEBRATES PER SEASON					Sceloporus spp.	0	32	0	0
Species	wet season	Dry season				Cryptotis parva	0	0	2	1
Ambystoma granulosum	0	1				Ambystoma granulosum	0	3	0	0
Anas diazi	2	0				Anas diazi	1	0	1	0
Barisia imbricata	15	5				Crotalus triseriatus	22	9	12	5
Crotalus triseriatus	31	0				Thamnophis spp.	13	10	17	5
Cryptotis parva	0	3				Barisia imbricata	0	5	24	0
Microtus mexicanus	18	43				Microtus mexicanus	0	0	40	21
Neotoma sp.	1	0				Neotoma sp.	0	0	0	1
Thamnophis spp.	11	9					36	59	99	33

## Sheet: SCA1_HID
1.244	3
0.876	4
0.626	7
0.179	4

## Sheet: SCA2_HID
19	3
33	4
16	7
4	4

## Sheet: SCA3_HID
0.639	3
0.421	4
0.349	7
0.258	4

## Sheet: SCA4_HID
45269	3
6419	4
28305	7
0	4

## Sheet: SCA2_HID1
1.244	30
0.876	50
0.626	91
0.179	28

## Sheet: SCA3_HID1
34689	30		60046	30		10580	30		14289	30
6419	50		173078	50		0	50		6804	50
19606	91		221123	91		8699	91		1707	91
0	28		133693	28		0	28		0	28

## Sheet: SCA4_HID1
34689	3		60046	3		10580	3		14289	3
6419	4		173078	4		0	4		6804	4
19606	7		221123	7		8699	7		1707	7
0	4		133693	4		0	4		0	4

## Sheet: SCA_HID6
1.244	3
0.876	11
0.626	71
0.179	26

[truncated: 11 more sheets: SCA3_HID2, SCA_HID5, SCA_HID4, SCA_HID3, SCA_HID2, Pruebas de correlación1_HID1, Pruebas de correlación_HID1, SCA_HID, SCA_HID1, Pruebas de correlación_HID, Pruebas de correlación1_HID]
